# Supplementary material for: In situ characterisation of phytohormones from wounded Arabidopsis leaves using desorption electrospray ionisation mass spectrometry imaging
Source: Royal Society of Chemistry journal article supplement (doi:10.1039/d0an02118k), 2021-01-01

### The protocol of isotopically labelled LC-MS/MS quantification analysis

For the quantification experiments, the amount of *Arabidopsis thaliana* (Col-0) leaves of 10 mg (fresh weight, FW) were freshly harvested transferred into 2 ml plastic Eppendorf tubes, containing 2-mm ceria-stabilized zirconium oxide beads (Retsch GmbH & Co. KG, Haan, Germany). The frozen leaf material was homogenized in 1 ml of ice cold 10% MeOH/H<sub>2</sub>O (v/v) extraction solution containing a cocktail of labelled standards (5 pmol of [<sup>2</sup>H<sub>2</sub>]JA-Ile, [<sup>13</sup>C<sub>6</sub>]IAA, [<sup>2</sup>H<sub>5</sub>]OPDA, and 10 pmol of [<sup>2</sup>H<sub>6</sub>]JA, [<sup>2</sup>H<sub>6</sub>]ABA, [<sup>2</sup>H<sub>3</sub>]PA, [<sup>2</sup>H<sub>4</sub>]SA) by an MM 301 vibration mill at a frequency of 27 Hz for 3 min. Samples were sonicated for 3 min in the ice bath and subsequently extracted using a benchtop laboratory rotator for 20 min at 4 °C. After spin down, the supernatants were transferred into clean tubes and re-extracted with 1 ml of ice cold 10% MeOH/H<sub>2</sub>O (v/v). All samples were pre-concentrated by RP polymer-based solid phase extraction (Oasis HLB columns, 30 mg/1 ml, Waters). The SPE sorbent was activated by 1 ml of 100% MeOH and equilibrated with 0.1% HCOOH/H<sub>2</sub>O (v/v). After sample loading, the column was washed with 1 ml of extraction solution and eluted with 3 ml of 80% MeOH/H<sub>2</sub>O (v/v). and then evaporated to dryness under gentle stream of nitrogen, the samples were reconstructed in 20 µL of 15% acetonitrile: 85% 10 mM HCOOH (v/v) for the LC-MS/MS analysis

Targeted phytohormones and their related compounds were analysed by an Acquity UPLC System (Waters) coupled to a triple quadrupole mass spectrometer Xevo™ TQ MS (Waters MS), and 5 µL of each sample was injected onto a RP column (Acquity UPLC CSH™ C18; 2.1x100 mm; 1.7 µm) at a flow rate of 0.4 ml/min. Analytes were separated by a gradient elution using 10 mM HCOOH (A) and ACN (B) over 35 min. as follows: 0–5 min isocratic elution (15% A; v/v); 5–15 min linear gradient to 45% A; 15–28 min, logarithmic gradient to 48.6% A; 28–29 min linear gradient to 100% A. Finally, the column was washed with 100% ACN and then equilibrated to the initial conditions for 5 min. The eluate was introduced into the electrospray ion source of a tandem MS analyser and analysed using the following MS/MS conditions: source temperature, 120°C; cone/desolvation gas flow, 70/650 L/h; capillary voltage, 3 kV; cone voltage, 23–30 V; collision energy, 12–23 eV; collision gas flow (argon), 0.21 mL/min. The analysed compounds and appropriate internal standards quantified in multiple ion monitoring mode (MRM) using optimized MS conditions and continuous polarity-switching data measurements. MRM transitions were recorded over each chromatographic run in ten targeted scan windows to obtain the greatest possible MS signal intensity for each compound. The MassLynx™ software package (version 4.1, Waters, Milford, MA, USA) was used to control the instrument and to acquire and process all of the MS data.

**Table 1. Absolute quantifications for the studied compounds determined through isotopically labelled LC-MS/MS analysis. Leaf samples (10 mg FW) were extracted, purified using the SPE procedure and analysed by LC-MS/MS. The standard curves with regression equations were also shown below.**

| Samples        | pmol/g DW ± SD; RSD [%] |       |               |         |      |               |           |        |               |      |      |               |       |       |               |
|----------------|-------------------------|-------|---------------|---------|------|---------------|-----------|--------|---------------|------|------|---------------|-------|-------|---------------|
|                | IAA                     |       |               | IAA-Glu |      |               | oxIAA-Glc |        |               | ABA  |      |               | PA    |       |               |
| Control leaves | 10.21                   | 11.08 | ± 1.65        | 5.53    | 5.86 | ± 0.48        | 365.14    | 319.08 | ± 39.91       | 2.78 | 2.90 | ± 0.37        | 9.69  | 11.23 | ± 1.53        |
|                | 12.99                   |       | RSD [%] 14.87 | 6.20    |      | RSD [%] 8.12  | 297.47    |        | RSD [%] 12.51 | 3.31 |      | RSD [%] 12.71 | 12.75 |       | RSD [%] 13.62 |
|                | 10.06                   |       |               | LOQ     |      |               | 294.65    |        |               | 2.60 |      |               | 11.25 |       |               |
| Wounded leaves | 11.88                   | 13.30 | ± 1.24        | 9.17    | 9.61 | ± 1.09        | 633.59    | 642.32 | ± 71.29       | 4.55 | 4.82 | ± 0.24        | 19.08 | 19.54 | ± 0.43        |
|                | 13.82                   |       | RSD [%] 9.35  | 8.81    |      | RSD [%] 11.33 | 575.79    |        | RSD [%] 11.10 | 4.88 |      | RSD [%] 5.03  | 19.93 |       | RSD [%] 2.18  |
|                | 14.20                   |       |               | 10.85   |      |               | 717.58    |        |               | 5.02 |      |               | 19.60 |       |               |

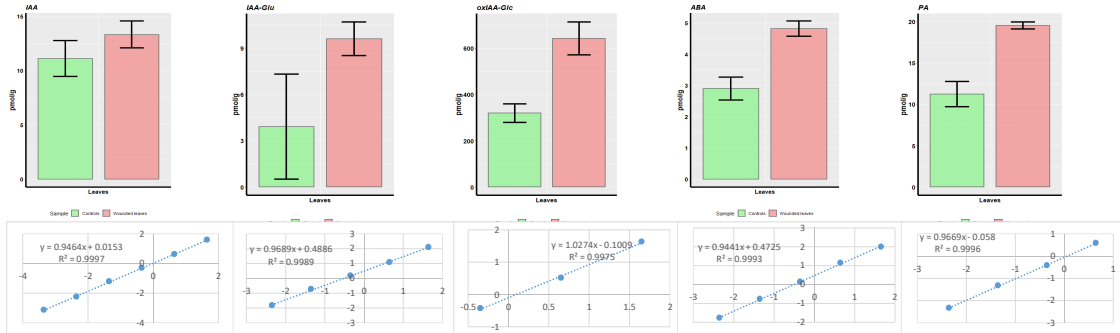

| Samples        | pmol/g DW ± SD; RSD [%] |        |               |         |         |               |          |        |               |            |      |               |         |         |               |
|----------------|-------------------------|--------|---------------|---------|---------|---------------|----------|--------|---------------|------------|------|---------------|---------|---------|---------------|
|                | SA                      |        |               | JA      |         |               | 12-OH-JA |        |               | 9,10-dh-JA |      |               | OPC-4   |         |               |
| Control leaves | 86.00                   | 100.07 | ± 13.72       | 1519.16 | 1876.94 | ± 575.87      | 29.08    | 36.67  | ± 7.32        | 3.04       | 4.38 | ± 1.42        | 1087.24 | 1721.84 | ± 808.35      |
|                | 100.79                  |        | RSD [%] 13.71 | 2541.25 |         | RSD [%] 30.68 | 37.25    |        | RSD [%] 19.96 | 4.22       |      | RSD [%] 32.42 | 2631.92 |         | RSD [%] 46.95 |
|                | 113.41                  |        |               | 1570.42 |         |               | 43.69    |        |               | 5.87       |      |               | 1446.36 |         |               |
| Wounded leaves | 92.31                   | 101.39 | ± 8.12        | 2862.35 | 3035.38 | ± 149.88      | 134.16   | 126.52 | ± 8.97        | 14.39      | 8.45 | ± 5.32        | 1818.90 | 2217.49 | ± 356.00      |
|                | 103.92                  |        | RSD [%] 8.01  | 3125.13 |         | RSD [%] 4.94  | 128.74   |        | RSD [%] 7.09  | 4.12       |      | RSD [%] 62.99 | 2329.69 |         | RSD [%] 16.05 |
|                | 107.95                  |        |               | 3118.66 |         |               | 116.64   |        |               | 6.84       |      |               | 2503.86 |         |               |

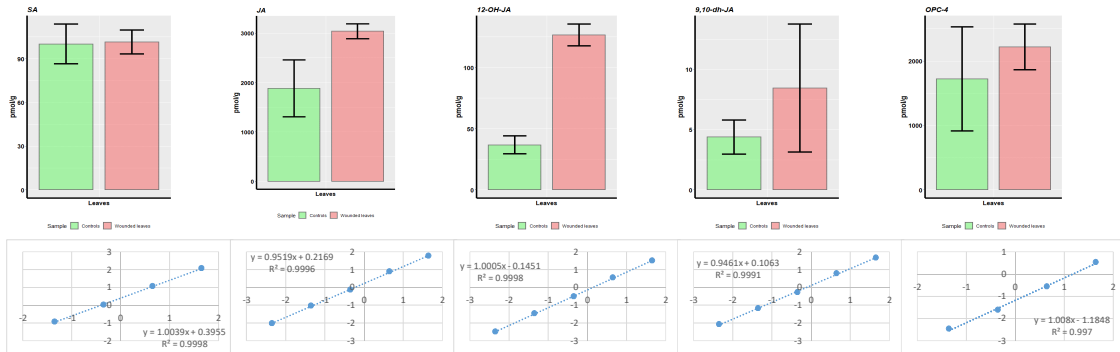

| Samples        | pmol/g DW ± SD; RSD [%] |        |               |        |       |               |          |         |               |          |         |               |        |        |               |
|----------------|-------------------------|--------|---------------|--------|-------|---------------|----------|---------|---------------|----------|---------|---------------|--------|--------|---------------|
|                | OPC-6                   |        |               | OPC-8  |       |               | cis-OPDA |         |               | dn-OPDA  |         |               | JA-Ile |        |               |
| Control leaves | 67.47                   | 87.15  | ± 23.88       | 17.73  | 27.28 | ± 16.33       | 2381.14  | 7812.03 | ± 4973.49     | 3817.99  | 7218.97 | ± 3486.92     | 400.46 | 430.95 | ± 134.96      |
|                | 113.72                  |        | RSD [%] 27.41 | 46.14  |       | RSD [%] 59.89 | 12144.48 |         | RSD [%] 63.66 | 10785.89 |         | RSD [%] 48.30 | 578.55 |        | RSD [%] 31.32 |
|                | 80.25                   |        |               | 17.95  |       |               | 8910.46  |         |               | 7053.02  |         |               | 313.83 |        |               |
| Wounded leaves | 215.77                  | 240.42 | ± 22.49       | 78.85  | 97.15 | ± 28.75       | 3136.48  | 6771.16 | ± 3173.00     | 5644.41  | 8023.95 | ± 2061.05     | 710.70 | 716.87 | ± 27.56       |
|                | 245.68                  |        | RSD [%] 9.35  | 82.32  |       | RSD [%] 29.59 | 8188.74  |         | RSD [%] 46.86 | 9178.07  |         | RSD [%] 25.69 | 746.99 |        | RSD [%] 3.84  |
|                | 259.81                  |        |               | 130.29 |       |               | 8988.26  |         |               | 9249.38  |         |               | 692.91 |        |               |

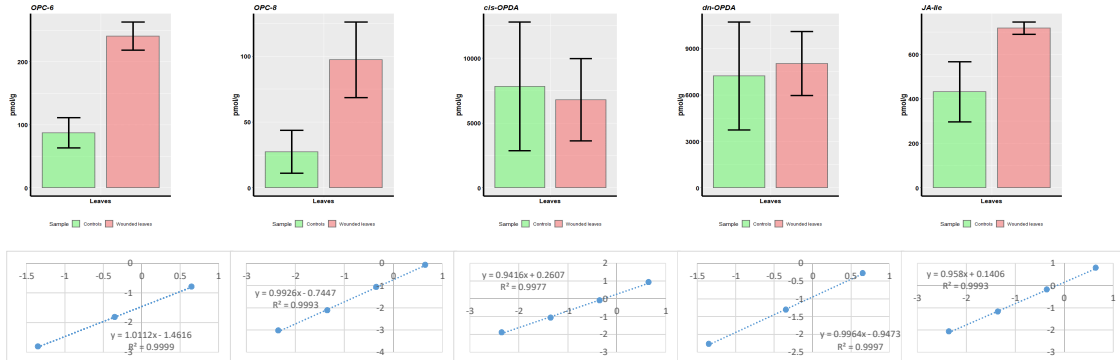

**Table 2. Absolute quantifications for the studied compounds determined through isotopically labelled LC-MS/MS analysis. Separated tissue samples (10 mg FW) were extracted, purified using the SPE procedure and analysed by LC-MS/MS. The standard curves with regression equations were also shown below.**

| Sample            | pmol/g DW $\pm$ SD; RSD [%] Levels in pmol/g FW |                       |       |                 |         |                       |          |                        |       |                  |
|-------------------|-------------------------------------------------|-----------------------|-------|-----------------|---------|-----------------------|----------|------------------------|-------|------------------|
|                   | <i>cis</i> -OPDA                                |                       | OPC-6 |                 | OPC-4   |                       | JA       |                        | ABA   |                  |
| Wounded regions   | 20089.24                                        |                       | 2.08  |                 | 8689.88 |                       | 15469.51 |                        | 38.94 |                  |
|                   | N.D                                             |                       | N.D   |                 | N.D     |                       | N.D      |                        | 37.91 |                  |
|                   | 12939.00                                        |                       | 1.63  |                 | 6102.50 |                       | 19643.00 |                        | 29.77 |                  |
|                   | 10530.56                                        |                       | 2.15  |                 | 5883.38 |                       | 12069.07 |                        | N.D   |                  |
|                   | 10434.29                                        | 9638.26 $\pm$ 4518.20 | 3.38  | 2.13 $\pm$ 0.77 | 5538.64 | 5371.72 $\pm$ 1699.49 | 8788.20  | 11715.18 $\pm$ 3988.90 | N.D   | 35.54 $\pm$ 5.03 |
|                   | 8562.22                                         | RSD [%] 0.47          | 2.69  | RSD [%] 0.36    | 4379.00 | RSD [%] 0.32          | 8872.83  | RSD [%] 0.34           | N.D   | RSD [%] 0.14     |
|                   | 6424.41                                         |                       | 1.71  |                 | 3353.34 |                       | 6875.72  |                        | N.D   |                  |
|                   | 8327.04                                         |                       | 2.20  |                 | 4251.67 |                       | 7494.26  |                        | N.D   |                  |
|                   | 5253.40                                         |                       | 2.81  |                 | 7031.66 |                       | 14586.14 |                        | N.D   |                  |
|                   | 4184.21                                         |                       | 0.51  |                 | 3115.37 |                       | 11637.88 |                        | N.D   |                  |
| Unwounded regions | 8719.78                                         |                       | 0.11  |                 | 246.40  |                       | 1949.09  |                        | 9.63  |                  |
|                   | 9228.12                                         |                       | 0.20  |                 | 262.14  |                       | 1494.97  |                        | 17.15 |                  |
|                   | 8164.81                                         |                       | N.D   |                 | 251.15  |                       | 1967.08  |                        | 14.21 |                  |
|                   | 9194.54                                         |                       | 0.31  |                 | 436.19  |                       | 3057.81  |                        | N.D   |                  |
|                   | 4991.97                                         | 7445.23 $\pm$ 2587.99 | 0.24  | 0.26 $\pm$ 0.18 | 312.59  | 305.80 $\pm$ 116.57   | 1277.50  | 1808.45 $\pm$ 489.08   | N.D   | 13.66 $\pm$ 3.79 |
|                   | 3255.04                                         | RSD [%] 0.35          | 0.13  | RSD [%] 0.71    | 139.42  | RSD [%] 0.38          | 1343.50  | RSD [%] 0.27           | N.D   | RSD [%] 0.28     |
|                   | 9203.21                                         |                       | 0.19  |                 | 245.50  |                       | 1421.75  |                        | N.D   |                  |
|                   | 9699.03                                         |                       | 0.76  |                 | 579.36  |                       | 1945.06  |                        | N.D   |                  |
|                   | 2631.88                                         |                       | 0.22  |                 | 336.95  |                       | 1710.20  |                        | N.D   |                  |
|                   | 9363.91                                         |                       | 0.19  |                 | 248.32  |                       | 1917.52  |                        | N.D   |                  |

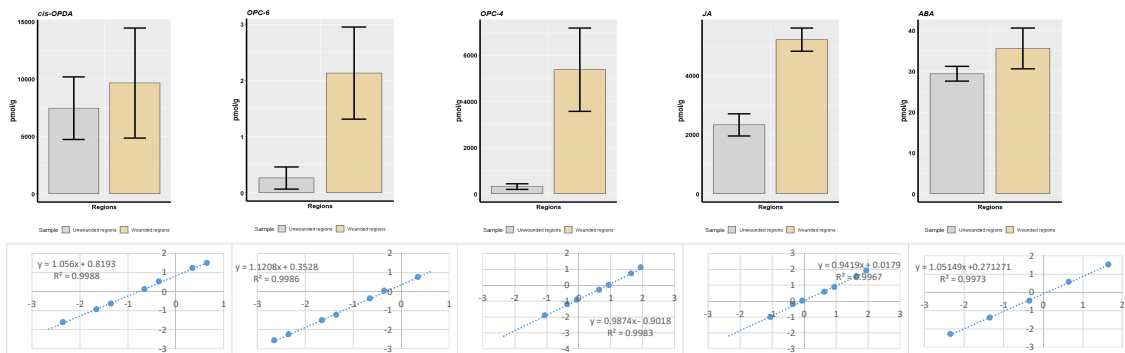

Supplement: d0an02118k3.pdf [file d0an02118k3.pdf]
